# Supplementary material
Source: publisher site journal article supplement (https://www.dovepress.com/article/586751)

| Gene name | Sequence | |
| --- | --- | --- |
| sense（5'-3'） | antisense（5'-3'） |
| NC | UUCUCCGAACGUGUCACGUTT | ACGUGACACGUUCGGAGAATT |
| siRNA-XAF1-1#（210） | CGAUGUGUCAGCAGAGCAUGC | AUGCUCUGCUGACACAUCGUA |
| siRNA-XAF1-2#（812） | GAUGUUCGUCCAAAGACAAGA | UUGUCUUUGGACGAACAUCUU |
| siRNA-XAF1-3#（554） | GAGUUGCCUGUGUGGUCAAGG | UUGACCACACAGGCAACUCUU |
| siRNA-P53-1#（278） | CCCGGACGAUAUUGAACAAUG | UUGUUCAAUAUCGUCCGGGGA |
| siRNA-P53-2#（716） | GCAUCUUAUCCGAGUGGAAGG | UUCCACUCGGAUAAGAUGCUG |
| siRNA-P53-3#（1584） | GAAAUGUUCUUGCAGUUAAGG | UUAACUGCAAGAACAUUUCUU |

Supplementary Table 1 Sequence information

Supplementary Table 2 Information Table of Antibody Detection by WB Method

| Antibody name | Dilution ratio | Manufacturer | Item Number | Batch number | Molecular weight |
| --- | --- | --- | --- | --- | --- |
| P53 | 1：1000 | bioss | bsm-33058M | AH06013022 | 53kDa |
| p-P53 | 1：1000 | abcam | ab1431 | GR144607-13 | 53kDa |
| XAF1 | 1：2000 | bioss | bs-1308R | AH19201108 | 50kDa |
| XIAP | 1：1000 | bioss | bs-1281R | 130823w | 53kDa |
| Cleaved Caspase-3 | 1：1000 | Affinity | AF7022 | 3m59842 | 17kDa |
| Bcl-2 | 1：1000 | abcam | AB32124 | 1000216-36 | 26 kDa |
| Cleaved PARP | 1：5000 | Proteintech | 60555-1-Ig | 00081024 | 89kDa |
| GAPDH | 1：2000 | Zsbio | TA-08 | 230040220 | 36 kDa |

Supplementary Figure 1 Transfection efficiency of si-P53 and si-XAF1


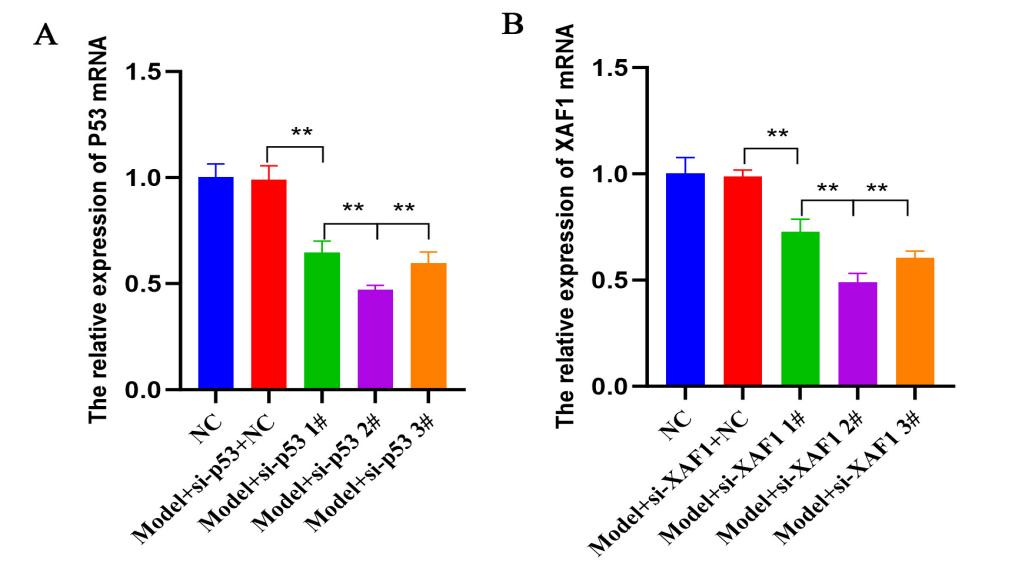

Supplement: Supplementary file 1 [file 586751_Supplementary%20Material.docx]
